# Supplementary material for: Genetic Circuits for Feedback Control of Gamma-Aminobutyric Acid Biosynthesis in Probiotic Escherichia coli Nissle 1917
Source: MDPI journal article supplement (doi:10.3390/metabo14010044), 2024-01-11
Supplement: s1 [file s1]

Supplementary Materials for

**Genetic circuits for feedback control of gamma-aminobutyric acid biosynthesis in probiotic  
*Escherichia coli* Nissle 1917**

Matthew Lebovich<sup>1,2</sup>, Marcos A. Lora<sup>1</sup>, Jared Gracia-David<sup>1,3</sup>, and Lauren B. Andrews<sup>1,2,3\*</sup>

<sup>1</sup> University of Massachusetts Amherst, Department of Chemical Engineering, Amherst, MA 01003, USA

<sup>2</sup> University of Massachusetts Amherst, Biotechnology Training Program, Amherst, MA, USA

<sup>3</sup> Amherst College, Department of Biology, Amherst, MA 01002, USA

<sup>4</sup> University of Massachusetts Amherst, Molecular and Cellular Biology Graduate Program, Amherst, MA, USA

\* Correspondence: lbandrews@umass.edu

## Contents

|                                                                       |    |
|-----------------------------------------------------------------------|----|
| Figure S1: GABA sensor characterization in production conditions..... | 3  |
| Figure S2: GABA production in EcN and EcN $\Delta gabTP$ .....        | 4  |
| Figure S3: EcN GABA production in different growth vessels .....      | 5  |
| Table S1: Genetic part sequences used in this work .....              | 6  |
| Table S2: Plasmids used in this work .....                            | 12 |
| Table S3: Hill equation parameters for NOT gates .....                | 13 |
| Table S4: Model parameter values used .....                           | 14 |
| References.....                                                       | 15 |

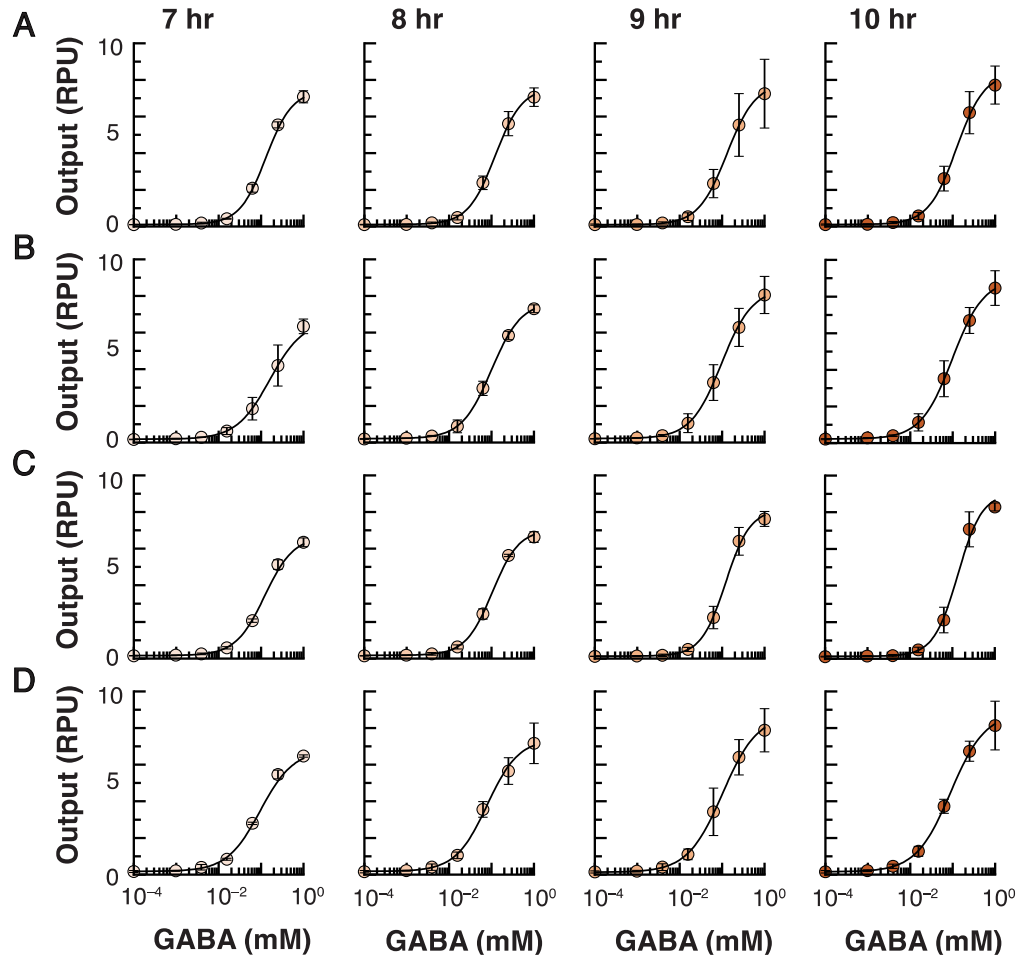

**Figure S1: GABA sensor characterization in production conditions.** The GABA sensor characterization plasmid pML3009 was induced with exogenous GABA at each concentration and grown in the following strains and vessels. (A) EcN  $\Delta gabTP$  pML3009 grown in flasks, (B) EcN pML3009 grown in flasks, (C) EcN pML3009 grown in culture tubes, and (D) EcN pML3009 grown in a 96-well microtiter plate. All cultures were inoculated at  $OD_{600} = 5.0 \times 10^{-5}$ . Single cell fluorescence was measured via flow cytometry (Methods). The markers represent the average of the median fluorescence measured on 3 separate days. The error bars are one standard deviation. The fitted response function for each is shown (solid line).

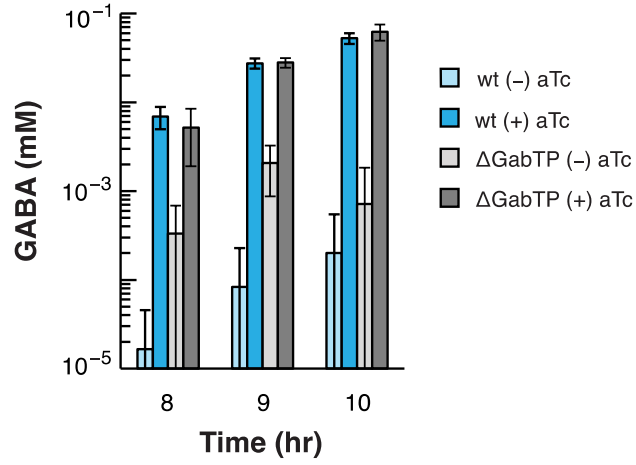

**Figure S2: GABA production in EcN and EcN  $\Delta$ gabTP.** For the data of the GABA production assays in Figure 2D, the output of the GABA biosensor was converted to GABA concentration using the corresponding fitted sensor response function (Figure S1). The bars represent the mean value from the 3 experiments and the error bars represent the standard deviation.

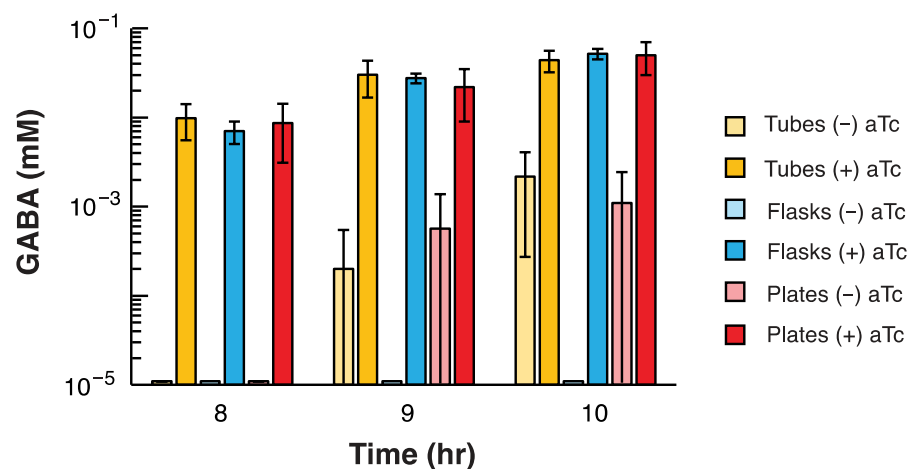

**Figure S3: EcN GABA production in different growth vessels.** For the data of the GABA production assays in Figure 2F, the output of the GABA biosensor was converted to GABA concentration using the corresponding fitted sensor response function (Figure S1). The bars represent the mean value from the 3 experiments and the error bars represent the standard deviation. Values of 0 mM are displayed as 0.000011 mM on the plot.

**Table S1: Genetic part sequences used in this work**

| Part Name           | Type     | DNA Sequence                                                                                                                                                                                                                                                                                                                                                                                                                                                                                                                     | Source |
|---------------------|----------|----------------------------------------------------------------------------------------------------------------------------------------------------------------------------------------------------------------------------------------------------------------------------------------------------------------------------------------------------------------------------------------------------------------------------------------------------------------------------------------------------------------------------------|--------|
| P <sub>AmtR</sub>   | Promoter | ctgtccaaccaaattgattcggtaccaattgacagtttctatcgatctata<br>gataatgctagc                                                                                                                                                                                                                                                                                                                                                                                                                                                              | (22)   |
| P <sub>BM3RI</sub>  | Promoter | Aatccgcgtgataggtctgattcggtaccaattgacggaatgaacgttc<br>attccgataatgctagc                                                                                                                                                                                                                                                                                                                                                                                                                                                           | (22)   |
| P <sub>IcaRA</sub>  | Promoter | gtcaactcataagattctgattcggtaccaattgacaattcacctaccttc<br>gtaggttaggtgt                                                                                                                                                                                                                                                                                                                                                                                                                                                             | (22)   |
| P <sub>PhIF</sub>   | Promoter | cgacgtacggtggaatctgattcggtaccaattgacatgatacgaac<br>gtaccgtatcgtaaggt                                                                                                                                                                                                                                                                                                                                                                                                                                                             | (22)   |
| P <sub>Gab105</sub> | Promoter | ataccatcaaaaagttataattggtactttacggcataccaagtcctagg<br>tactatgctagc                                                                                                                                                                                                                                                                                                                                                                                                                                                               | (25)   |
| P <sub>Tet</sub>    | Promoter | Tactccaccgttggtttttccctatcagtgatagagattgacatccct<br>atcagtgatagagataatgagcac                                                                                                                                                                                                                                                                                                                                                                                                                                                     |        |
| A1                  | RBS      | aatgttccctaataatcagcaaagaggttag                                                                                                                                                                                                                                                                                                                                                                                                                                                                                                  | (21)   |
| B1                  | RBS      | ctatggactatgttttaactactag                                                                                                                                                                                                                                                                                                                                                                                                                                                                                                        | (21)   |
| B2                  | RBS      | ctatggactatgttttcaaagacgaaaaactactag                                                                                                                                                                                                                                                                                                                                                                                                                                                                                             | (21)   |
| I1                  | RBS      | attgctatggactatgttcaaagtgagaatactag                                                                                                                                                                                                                                                                                                                                                                                                                                                                                              | (21)   |
| P1                  | RBS      | ctatggactatgttgaaaggagaaatactag                                                                                                                                                                                                                                                                                                                                                                                                                                                                                                  | (21)   |
| P2                  | RBS      | ggagctatggactatgtttgaaaggctgaaatactag                                                                                                                                                                                                                                                                                                                                                                                                                                                                                            | (21)   |
| <i>amtR</i>         | Gene     | atggcaggcgcagttggtcgtccgcgtcgtagtcaccgcgtcgtgc<br>aggtaaaaatccgcgtgaagaaattctggatgcaagcgcagaactgtt<br>taccgctcagggtttgaaccaccagtacctatcagattgcagatgc<br>agttggtattcgtcaggcaagcctgtattatcatttccgagcaaaaccg<br>aaatctttctgacctgctgaaaagcaccgtgaaccgagcaccgttct<br>ggcagaagatctgagcaccctggatgcaggtccggaatgcgtctgt<br>gggcaattgttgcaagcgaagttcgtctgctgctgagcaccaaaatgga<br>atgttggtcgtctgtatcagctgccgattgttgtagcgaagaattgca<br>gaatatcatagccagcgtgaagcactgaccaatgttttcgtatctgg<br>caaccgaaattgttggtgatgatccgcgtgcagaactgccgtttcatatt | (22)   |

|              |      |                                                                                                                                                                                                                                                                                                                                                                                                                                                                                                                                                                                                                                                             |      |
|--------------|------|-------------------------------------------------------------------------------------------------------------------------------------------------------------------------------------------------------------------------------------------------------------------------------------------------------------------------------------------------------------------------------------------------------------------------------------------------------------------------------------------------------------------------------------------------------------------------------------------------------------------------------------------------------------|------|
|              |      | accatgagcgttattgaaatgcgtcgcgaatgatggtaaaattccgagtc<br>cgctgagcgcagatagcctgccggaaaccgcaattatgctggcagat<br>gcaagcctggcagttctgggtgcaccgctgcctgcagatcgtgttgaa<br>aaaaccctggaactgattaaacaggcagatgcaaaataa                                                                                                                                                                                                                                                                                                                                                                                                                                                        |      |
| <i>bm3RI</i> | Gene | atggaaagcaccgccacaaacagaaagcaatttttagcgcaagcct<br>gctgctgtttgcagaacgtggtttgatgcaaccaccatgccgatgatt<br>gcagaaaatgcaaaagttggtgcaggcaccattatcgtatttcaaaa<br>acaagaaagcctggtgaacgaactgtttcagcagcatgtaaatgaatt<br>tctgcagtgtattgaaagcggctggtgcaaatgaacgtgatggtatcgt<br>gatggctttcatcacattttgaaggatggtgacctttacaaaaatcat<br>ccgcgtgcactgggtttatcaaaaccatagccagggcacctttctga<br>ccgaagaaagccgtctggcatatcagaaactggtgaatttgtgtgca<br>cctttttcgtgaaggtcagaaacaggggtgtattcgtaatctgccgga<br>aaatgcactgattgcaattctgtttggcagctttatggaagtgtatgaat<br>gatcgagaacgattatctgagcctgaccgatgaactgctgaccgggtg<br>tgaagaaagcctgtgggcagcactgagccgtcagagctaa                          | (22) |
| <i>icaRA</i> | Gene | gtgaaagacaaaattatcgataacgccatcacctgttttagcgaaaaa<br>ggttatgacggcaccaccctggatgatattgcaaaaagcgtgaacatc<br>aaaaaagccagcctgtattatcactttgatagcaaaaaaagcatctacg<br>agcagagcgttaaatgctgtttcgattatctgaacaacatcatcatgatg<br>aaccagaacaaaagcaactatagcatcgatgccctgtatcagtttctgt<br>ttgagttcatcttgatcagaggaacgctatattcgtatgtatgttcagct<br>gagcaacacaccggaagaattttcaggtaacatttatggccagatcca<br>ggatctgaatcagagcctgagcaaaagaaatcgccaaattctatgacg<br>aaagcaaaatcaaaatgaccaaaggagactccagaatctgattctgc<br>tgtttctggaaagctggtatctgaaagccagcttttagccagaaatttgg<br>gcagttgaagaaagcaaaagccagtttaagatgaggtttatagcctg<br>ctgaacatctttctgaagaaataa                                  | (22) |
| <i>phlF</i>  | Gene | atggcacgtaccccgagccgtagcagcattggtagcctgcgtagtc<br>gcatacccataaagcaattctgaccagcaccattgaaatcctgaaaga<br>atgtggttatagcggctgagcattgaaagcgttgacgtcgtgccgggt<br>gcaagcaaaccgaccatttatcgttggtggaccaataaagcagcact<br>gattgccgaagtgtatgaaaatgaaagcgaacaggtgcgtaaatcc<br>ggatctgggtagctttaagccgatctggattttctgctgcgtaatctgt<br>ggaaagtttggcgtgaaaccatttgggtgaagcatttcgtgtgtattg<br>cagaagcacagctggaccctgcaaccctgaccagctgaaagatca<br>gtttatggaacgtcgtcgtgagatgccgaaaaaactggttgaatgc<br>cattagcaatggtgaactgccgaaagataccaatcgtgaactgctgct<br>ggatatgatttttgggttttgggtatcgctgctgaccgaacagctgac<br>cgttgaacaggatattgaagaatttaccttctgctgattaatgggtgttg<br>tccgggtacacagcgtaa | (22) |

|             |      |                                                                                                                                                                                                                                                                                                                                                                                                                                                                                                                                                                                                                                                                                                                                                                                                                                                                                                                                                                                                                                                                                                                                                                                                                                                                                                                                                                                                                                                                                                                                                                                                    |      |
|-------------|------|----------------------------------------------------------------------------------------------------------------------------------------------------------------------------------------------------------------------------------------------------------------------------------------------------------------------------------------------------------------------------------------------------------------------------------------------------------------------------------------------------------------------------------------------------------------------------------------------------------------------------------------------------------------------------------------------------------------------------------------------------------------------------------------------------------------------------------------------------------------------------------------------------------------------------------------------------------------------------------------------------------------------------------------------------------------------------------------------------------------------------------------------------------------------------------------------------------------------------------------------------------------------------------------------------------------------------------------------------------------------------------------------------------------------------------------------------------------------------------------------------------------------------------------------------------------------------------------------------|------|
| <i>gabR</i> | Gene | atggatatacagattacactcgatcgttcagaacaagccgattatatcta<br>tcagcaaatttatcaaaagctgaaaaaagaaatcctcagccgcaatct<br>gctgccgcactcgaagggtccctccaagcgggagctggctgaaaaac<br>tcaaggtcagcgtaaattcagtgaattcagcctatcagcagctgctgg<br>ctgaggggtattgtacgccattgaacgaaagggtttctcgtggagga<br>actagacatgtttccgccgaggagcaccctccatttgcactgccggat<br>gacctaaaagagattcacatcgaccagagcgattggatatacgtttcac<br>acatgagttccgatacagaccattttccgatcaaaagctgggtccgctg<br>cgagcaaaaagcggcctcccgtcataccgcacgctcggcgatatgt<br>cacatccgcaagggatataatgaagtgagagcggccattacgaggctc<br>atttccctgacgaggggtgtaaaatgcaggccggaacaaatgatcata<br>ggggcaggcacacaggtgctcatgcagctgtgactgagcttttacc<br>aaggaagccgtgtatgcgatggaggagcctggctacaggcgcatgt<br>atcagctttgaagaatgccggaacaagtaaagacgatcatgctgg<br>atgaaaaaggcatgtcgattgctgaaatcaccagacagcagccagat<br>gtgctggtgaccaccccgctcgcacagtttccgtccggaacgattatg<br>cctgtatccagaagaattcagctgctgaactgggcagccgaggagcc<br>gcgccgatatacattgaggacgattatgatagtgaattcacatatgatg<br>tagacagtattccggcgctgcaaagcctcgaccgtttcaaaatgcat<br>ctatatgggaacctttcaaaagtccttctccccggcttacggatcagct<br>atatggtgttccgcctgagctgttgagggcatacaaacagcggggc<br>tatgatctgcagacttgctcatcactcacacagctcacctgcaggaat<br>ttatcagctctggtgaatatcagaagcatataaaaaaatgaagcagc<br>attataaagaaaagagagaacgcctgatcaccgctttagaagcagag<br>ttcagcggagaggttaccgtaaaaggggcaaatgcggggctgcattt<br>tgttaccgaatttgataccaggcgcaccgaacaagacatcctgtcaca<br>tgctgccgggctgcagcttgaaatattcggaatgagccgatttaactg<br>aaggaaaacaagcggcaaacgggcaggcctgctctcattatcggctt<br>tgcacggctgaaggaaagatattcaggagggtgtgcagcggcttt<br>tcaaagcgggttacggacataaaaaaatccccgttacaggggattga | (36) |
| <i>eYFP</i> | Gene | atggtgagcaagggcgaggagctgttcaccgggggtgtgcccattcc<br>tggtcagctggacggcgacgtaaacggccacaagttcagcgtgtc<br>cggcgagggcgagggcgatgccacctacggcaagctgacctgaa<br>gttcattctgcaccacaggcaagctgcccgtgccctggcccaccctcg<br>tgaccaccttcggctacggcctgcaatgttcgccgctaccccgacc<br>acatgaagctgcacgacttcttcaagtccgcatgcccgaaggctac<br>gtccaggagcgcaccatcttcttcaaggacgacggcaactacaagac<br>ccgcgccgaggtgaagttcgagggcgacaccctggtgaaccgcatc<br>gagctgaagggcacgacttcaaggaggacggcaacatcctggggc<br>acaagctggagtacaactacaacagccacaacgtctatatcatggcc<br>gacaagcagaagaacggcatcaaggtgaacttcaagatccgccaca<br>acatcgaggacggcagcgtgcagctcggcgaccactaccagcaga                                                                                                                                                                                                                                                                                                                                                                                                                                                                                                                                                                                                                                                                                                                                                                                                                                                                                                                                                                               | (37) |



|             |      |                                                                                                                                                                                                                                                                                                                                                                                                                                                                                                                                                                                                                                                                                                                                                                                                                                                                                                                                                                                                                                                                                                                                                                                                            |      |
|-------------|------|------------------------------------------------------------------------------------------------------------------------------------------------------------------------------------------------------------------------------------------------------------------------------------------------------------------------------------------------------------------------------------------------------------------------------------------------------------------------------------------------------------------------------------------------------------------------------------------------------------------------------------------------------------------------------------------------------------------------------------------------------------------------------------------------------------------------------------------------------------------------------------------------------------------------------------------------------------------------------------------------------------------------------------------------------------------------------------------------------------------------------------------------------------------------------------------------------------|------|
|             |      | acaccccaatcggcgacggccccgtgctgctgcccgacaaccacta<br>ccttagctaccagtccgcctgagcaaagaccccaacgagaagcgc<br>gatcacatggctctgctggagttcgtgaccgcccgggagatcactctc<br>ggcatggacgagctgtacaagtaa                                                                                                                                                                                                                                                                                                                                                                                                                                                                                                                                                                                                                                                                                                                                                                                                                                                                                                                                                                                                                            |      |
| <i>lacI</i> | Gene | atgaaaccagtaacgttatac gatgtcgcagagtatgccggtgtctctt<br>atcagaccgtttcccgcgtgggtgaaccaggccagccacgtttctgcga<br>aaacgcgggaaaaagtggaaagcggcgatggcggagctgaattacat<br>tcccaaccgcgtggcacaacaactggcgggcaaacagtcgttgcgtg<br>attggcgttgccacctccagtctggccctgcacgcgcgtcgcgaaatt<br>gtcgcggcgattaaatctcgcgccgatcaactgggtgccagcgtggt<br>gggtgcgatggtagaacgaagcggcgctgaagcctgtaaagcggcg<br>gtgcacaatcttctcgcgcaacgcgtcagtgggctgacattaactatc<br>cgctggatgaccaggatgccattgctgtggaagctgcctgcactaatg<br>ttccggcgttatttcttgatgtctctgaccagaccccatcaacagtatta<br>tttttcccatgaggacggtacgcgactgggcgtggagcatctggctg<br>cattgggtcaccagcaaatcgcgctgttagcggggccattaagtctgt<br>ctcggcgcgctctgcgtctggctggctggcataaatatctactcgcaat<br>caaattcagccgatagcggaaacgggaaggcgactggagtgccatgt<br>ccggtttcaacaacccatgcaaatgctgaatgagggcacgttccca<br>ctgcgatgctggttccaacgatcagatggcgctgggcgcaatgcgc<br>gccattaccgagtcggggtgcgcgttggtgcggatctcggtagtg<br>ggatacgacgataccgaagatagctcatgttatatcccgcgttaacc<br>accatcaaacaggattttcgctgctggggcaaacccagcgtggaccg<br>cttgcctgcaactctctcagggccaggcgggtgaagggaatcagctgtt<br>gccagtcctactggtgaaaagaaaaaccaccctggcgcccaatac<br>caaaccgcctctccccgcgcttgccgattcattaatgcagctggca<br>cgacagggttcccactggaaagcgggcagtga | (22) |
| <i>tetR</i> | Gene | atgtccagattagataaaagttaaagtattaacagcgcattagagctgc<br>ttaatgaggtcggaaatcgaaggtttaacaacccgtaaactgcccaga<br>agctaggtgtagagcagcctacattgtattggcatgtaaaaataagc<br>gggctttgctcgacgccttagccattgagatgtagataggcaccatac<br>tacttttggcctttagaaggggaaagctggcaagatttttacgtaata<br>acgctaaaagttttagatgtgctttactaagtcacgcgatggagcaaa<br>agtacatttaggtacacggcctacagaaaaacagtatgaaactctcga<br>aaatcaattagccttttatgccaacaagggttttactagagaatgcatt<br>atatgcactcagcgtgtggggcattttacttttaggttgcgtattggaag<br>atcaagagcatcaagtcgctaagaagaaagggaacacctactact<br>gatagtatccgccattattacgacaagctatcgaattttgatcacca<br>aggtgcagagccagccttcttattcggcctgaattgatcatatgcgga<br>ttagaaaaacaacttaaatgtgaaagtgggtcctaa                                                                                                                                                                                                                                                                                                                                                                                                                                                                                                                        | (22) |

|              |            |                                                                                                                                                                                                                                                                                                                                                                                                                                                                                                                                                                                                                                                                                                                                                                                                                                                                                                  |      |
|--------------|------------|--------------------------------------------------------------------------------------------------------------------------------------------------------------------------------------------------------------------------------------------------------------------------------------------------------------------------------------------------------------------------------------------------------------------------------------------------------------------------------------------------------------------------------------------------------------------------------------------------------------------------------------------------------------------------------------------------------------------------------------------------------------------------------------------------------------------------------------------------------------------------------------------------|------|
| <i>kanR</i>  | Gene       | atgagccatattcaacgggaaacgtcttgctccaggccgcgattaaatt<br>ccaacatggatgctgatttatatgggtataaatgggctcgcgataatgt<br>cgggcaatcaggtgcgacaatctatcgattgtatgggaagcccgatg<br>cgccagagttgttctgaaacatggcaaaggtagcgttgccaatgatgt<br>tacagatgagatgggtcagactaaactggctgacggaatttatgcctctt<br>ccgaccatcaagcattttatccgtactcctgatgatgcatggttactcac<br>cactgcgatccccgggaaaacagcattccagggtattagaagaatatcc<br>tgattcaggtgaaaatattgttgatgcgtggcagtggtcctgcgccgg<br>ttgattcgattcctgtttgtaattgtcctttaacagcgatcgctatttcg<br>tctcgtcaggcgcaatcacgaataacggttggttgatgcgagt<br>gattttgatgacgagcgtaattggctggcctgttgacaagtctggaaa<br>gaaatgcataagcttttgccattctaccggattcagtcgtcactcatgg<br>tgatttctcacttgataacctattttgacgaggggaaattaataggtgt<br>attgatgttgacgagtcggaatcgacagaccgataaccaggatcttgcc<br>atcctatggaactgcctcggtagttttctcttcattacagaaaaggctt<br>ttcaaaaatatggtattgataatcctgatatgaataaattgcagtttcattt<br>gatgctcgatgagttttctaa | (33) |
| BydvJ        | Insulator  | gggtgtctcaaggctgcgtacttgactgatgagtcgaaaggacgaa<br>acaccctctacaaataattttgttaa                                                                                                                                                                                                                                                                                                                                                                                                                                                                                                                                                                                                                                                                                                                                                                                                                     | (21) |
| ElvJ         | Insulator  | gccccatagggtgggtgtgtaccaccctgatgagtcgaaaggacga<br>aatggggcctctacaaataattttgttaa                                                                                                                                                                                                                                                                                                                                                                                                                                                                                                                                                                                                                                                                                                                                                                                                                  | (21) |
| SarJ         | Insulator  | gactgtcgccgagtgatgtatccgacctgacgatggcccaaaagggcc<br>gaaacagtcctctacaaataattttgttaa                                                                                                                                                                                                                                                                                                                                                                                                                                                                                                                                                                                                                                                                                                                                                                                                               | (21) |
| RiboJ53      | Insulator  | gcggtcaacgcgatgtgctttgcgttctgatgagacagtgatgcgaaa<br>ccgcctctacaaataattttgttaa                                                                                                                                                                                                                                                                                                                                                                                                                                                                                                                                                                                                                                                                                                                                                                                                                    | (21) |
| RiboJ64      | Insulator  | aggagtcaattaatgtgcttttaattctgatgagacggtgacgtcgaaa<br>ctccctctacaaataattttgttaa                                                                                                                                                                                                                                                                                                                                                                                                                                                                                                                                                                                                                                                                                                                                                                                                                   | (21) |
| L3S2P55      | Terminator | ctcggtaccaaagacgaacaataagacgctgaaaagcgtctttttcgt<br>tttggtcc                                                                                                                                                                                                                                                                                                                                                                                                                                                                                                                                                                                                                                                                                                                                                                                                                                     | (38) |
| L3S2P24      | Terminator | ctcggtaccaaattccagaaaagacacccgaaagggtgtttttcgtttt<br>gggtcc                                                                                                                                                                                                                                                                                                                                                                                                                                                                                                                                                                                                                                                                                                                                                                                                                                      | (38) |
| ECK120015170 | Terminator | acaattttcgaaaaaacccgcttcggcgggttttttatagctaaaa                                                                                                                                                                                                                                                                                                                                                                                                                                                                                                                                                                                                                                                                                                                                                                                                                                                   | (38) |
| L3S2P11      | Terminator | ctcggtaccaaattccagaaaagacgctttcgagcgtctttttcgttt<br>tggtcc                                                                                                                                                                                                                                                                                                                                                                                                                                                                                                                                                                                                                                                                                                                                                                                                                                       | (38) |
| ECK120033737 | Terminator | ggaaacacagaaaaagcccgacctgacagtgcgggctttttttc<br>gaccaaagg                                                                                                                                                                                                                                                                                                                                                                                                                                                                                                                                                                                                                                                                                                                                                                                                                                        | (38) |

|              |            |                                                            |      |
|--------------|------------|------------------------------------------------------------|------|
| L3S2P11      | Terminator | ctcggtagcaaatccagaaaagagacgctttcgagcgtcttttcggtt<br>tggtcc | (38) |
| ECK120033737 | Terminator | ggaaacacagaaaaagcccgcacgtgacagtgcgggcttttttc<br>gaccaaagg  | (38) |
| L3S3P21      | Terminator | ccaattattgaaggcctccctaacggggggcctttttgttctggtctc<br>cc     | (38) |
| L3S3P51      | Terminator | aaaaaaaaaacaccctaacgggtgtttttgttctggtctccc                 | (38) |

**Table S2: Plasmids used in this work**

| <b>Plasmid Name</b> | <b>Description</b>                                                                                                                  | <b>Source</b> |
|---------------------|-------------------------------------------------------------------------------------------------------------------------------------|---------------|
| pAN1717             | RPU strain expressing YFP under control of J23101 on a backbone expressing <i>lacI</i> , <i>tetR</i> , <i>kanR</i> and the p15a ori | (21)          |
| pML3001             | Plasmid backbone containing <i>gabR</i> , <i>lacI</i> and <i>tetR</i> as well as the resistance gene <i>kanR</i> and the p15a ori.  | (25)          |
| pML3009             | Plasmid expressing YFP under the control of P <sub>Gab</sub> on the pML3001 backbone                                                | (25)          |
| pML3021             | Open loop GABA production circuit. P <sub>Gab</sub> -YFP, P <sub>Tet</sub> -GadB                                                    | This work     |
| pML3030             | Feedback circuit using the IcaRA I1 NOT gate on the pML3001 backbone                                                                | This work     |
| pML3031             | Feedback circuit using the AmtR A1 NOT gate on the pML3001 backbone                                                                 | This work     |
| pML3032             | Feedback circuit using the PhlF P1 NOT gate on the pML3001 backbone                                                                 | This work     |
| pML3033             | Feedback circuit using the PhlF P2 NOT gate on the pML3001 backbone                                                                 | This work     |
| pML3034             | Feedback circuit using the BM3RI B1 NOT gate on the pML3001 backbone                                                                | This work     |
| pML3035             | Feedback circuit using the BM3RI B2 NOT gate on the pML3001 backbone                                                                | This work     |

**Table S3: Hill equation parameters for NOT gates**

| <b>Repressor</b> | <b>RBS</b> | $y_{min}$ | $y_{max}$ | $K$   | $n$   |
|------------------|------------|-----------|-----------|-------|-------|
| AmtR             | A1         | 0.032     | 2.597     | 0.209 | 1.881 |
| BM3R1            | B1         | 0.012     | 0.336     | 0.178 | 3.437 |
| BM3R1            | B2         | 0.005     | 0.517     | 0.317 | 2.865 |
| IcaRA            | I1         | 0.187     | 1.847     | 0.066 | 3.772 |
| PhlF             | P1         | 0.003     | 3.550     | 0.175 | 3.924 |
| PhlF             | P2         | 0.015     | 5.306     | 0.843 | 4.880 |

All parameters are from a prior study (23).

**Table S4: Model parameter values used**

| Parameter        | Value | Units              |
|------------------|-------|--------------------|
| $\alpha_B$       | 1.0   | [GadB]/([RNA]*min) |
| $\gamma$         | 0.025 | 1/min              |
| $\beta_B$        | 0.10  | 1/min              |
| $\beta_{\mu_G}$  | 20.0  | 1/min              |
| $\xi$            | 0.025 | [mRNA]/(min*RPU)   |
| $k$              | 0.25  | 1/min              |
| $S$              | 35.0  | g/L                |
| $\beta_G$        | 3.0   | g/(L*min)          |
| $\alpha_{\mu_G}$ | 3.0   | RPU/min            |
| $y_{min\mu_G}$   | 0.04  | RPU                |
| $y_{max\mu_G}$   | 4.59  | RPU                |
| $K_{\mu_G}$      | 16.23 | g/L                |
| $n_{\mu_G}$      | 0.90  | unitless           |

Parameters  $\gamma$  and  $\xi$  are based on a prior study (33).

Parameters  $y_{min\mu_G}$ ,  $y_{max\mu_G}$ ,  $K_{\mu_G}$ , and  $n_{\mu_G}$  are based on a prior study (25).

## References Cited in Supplementary Materials

- (21) Nielsen, A. A. K.; Der, B. S.; Shin, J.; Vaidyanathan, P.; Paralanov, V.; Strychalski, E. A.; Ross, D.; Densmore, D.; Voigt, C. A. Genetic Circuit Design Automation. *Science* 2016, 352, aac7341. <https://doi.org/10.1126/science.aac7341>.
- (22) Stanton, B. C.; Nielsen, A. A. K.; Tamsir, A.; Clancy, K.; Peterson, T.; Voigt, C. A. Genomic Mining of Prokaryotic Repressors for Orthogonal Logic Gates. *Nat. Chem. Biol.* 2014, 10 (2), 99–105. <https://doi.org/10.1038/nchembio.1411>.
- (23) Lebovich, M.; Zeng, M.; Andrews, L. B. Algorithmic Programming of Sequential Logic and Genetic Circuits for Recording Biochemical Concentration in a Probiotic Bacterium. *ACS Synth. Biol.* 2023, 12 (9), 2632–2649. <https://doi.org/10.1021/acssynbio.3c00232>.
- (25) Lebovich, M.; Andrews, L. Surveying the Genetic Design Space for Transcription Factor-Based Metabolite Biosensors: Synthetic Gamma-Aminobutyric Acid and Propionate Biosensors in *E. coli* Nissle 1917. *Front. Bioeng. Biotechnol.* 2022, 10, 1227. <https://doi.org/10.3389/fbioe.2022.938056>.
- (33) Andrews, L. B.; Nielsen, A. A. K.; Voigt, C. A. Cellular Checkpoint Control Using Programmable Sequential Logic. *Science* 2018, 361, eaap8987. <https://doi.org/10.1126/science.aap8987>.
- (36) Belitsky, B. R.; Sonenshein, A. L. GabR, a Member of a Novel Protein Family, Regulates the Utilization of  $\gamma$ -Aminobutyrate in *Bacillus subtilis*. *Mol. Microbiol.* 2002, 45 (2), 569–583. <https://doi.org/10.1046/j.1365-2958.2002.03036.x>.
- (37) Cormack, B. P.; Valdivia, R. H.; Falkow, S. FACS-Optimized Mutants of the Green Fluorescent Protein (GFP). *Gene* 1996, 173 (1), 33–38. [https://doi.org/10.1016/0378-1119\(95\)00685-0](https://doi.org/10.1016/0378-1119(95)00685-0).
- (38) Chen, Y.-J.; Liu, P.; Nielsen, A. A. K.; Brophy, J. A. N.; Clancy, K.; Peterson, T.; Voigt, C. A. Characterization of 582 Natural and Synthetic Terminators and Quantification of Their Design Constraints. *Nat. Methods* 2013, 10 (7), 659–664. <https://doi.org/10.1038/nmeth.2515>.
